# Supplementary material for: Redox- and expression-proteomic analysis of plasma biomarkers in bladder transitional cell carcinoma
Source: Royal Society of Chemistry journal article supplement (doi:10.1039/c2mb25276g), 2012-10-11

**A Spot 888**  
 Carbonic anhydrase 1

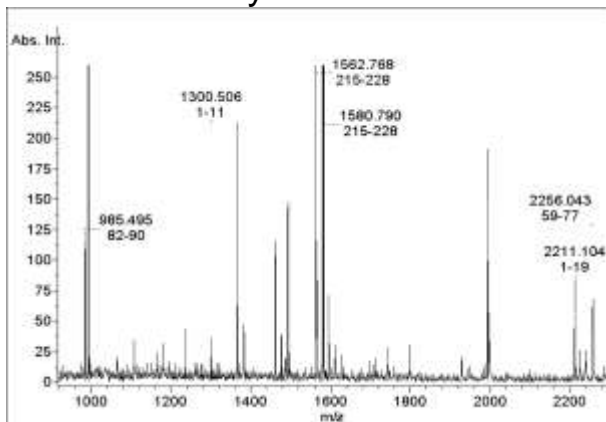

**B Spot 551**  
 Fibrinogen gamma chain

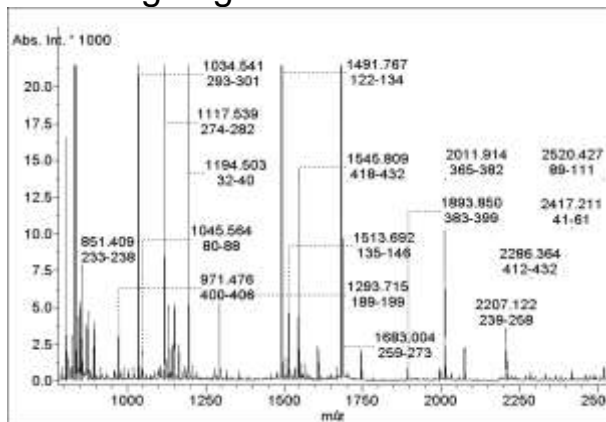

**C Spot 601**  
 CD5 antigen-like protein

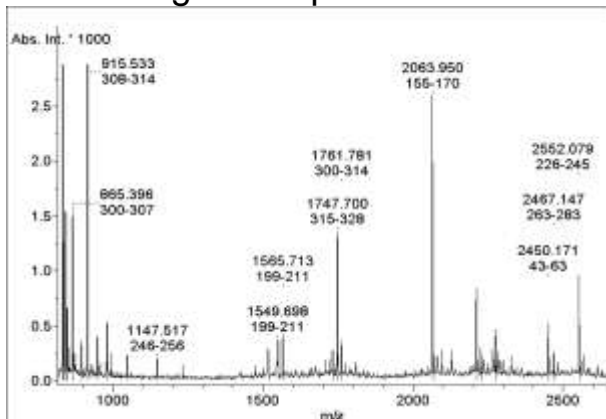

**D Spot 779**  
 Tropomyosin alpha-4 chain

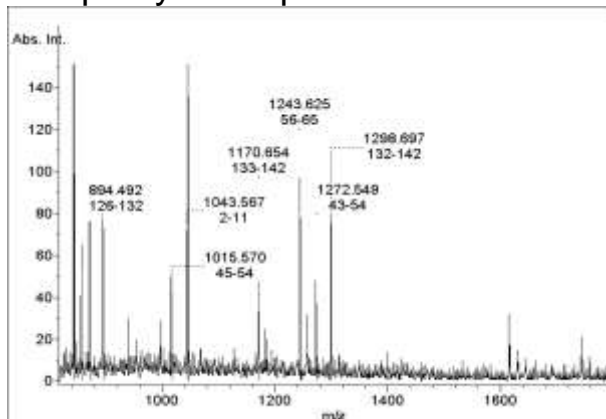

**E Spot 590**  
 Leucine-rich alpha-2 glycoprotein

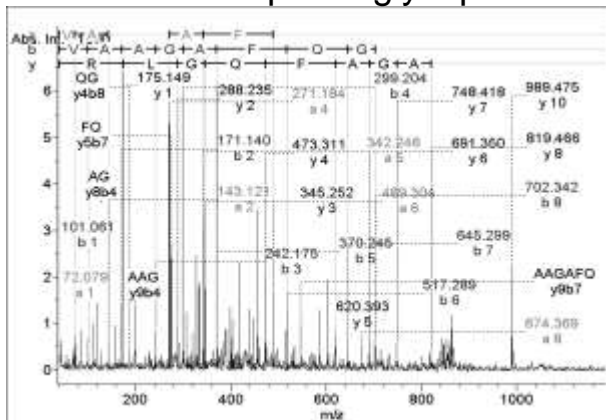

**F Spot 711**  
 Haptoglobin

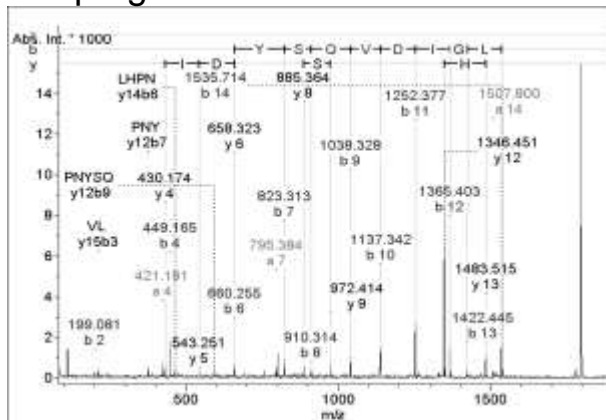

**A Spot 1146**  
 Alpha-1-acid glycoprotein

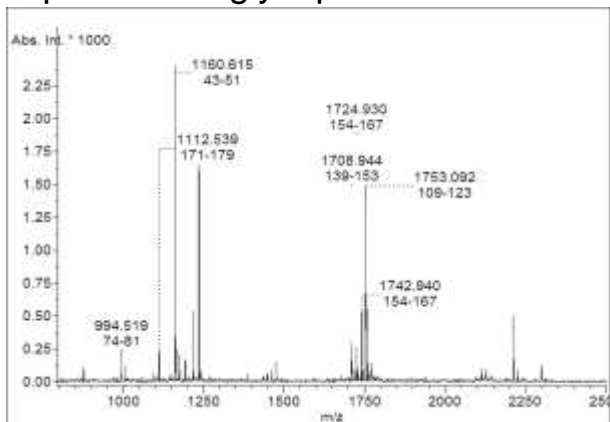

**B Spot 1075**  
 Apolipoprotein A-4

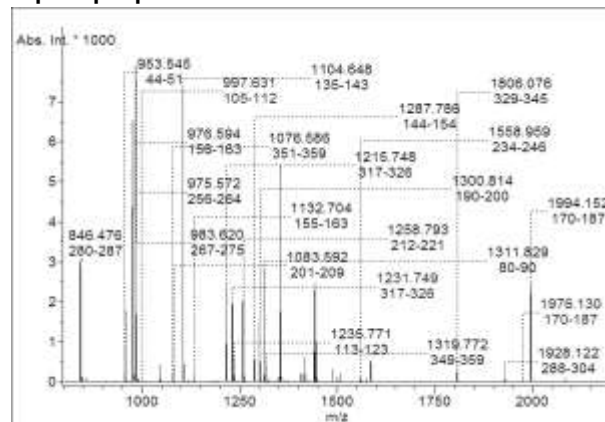

**C Spot 426**  
 Serotransferrin

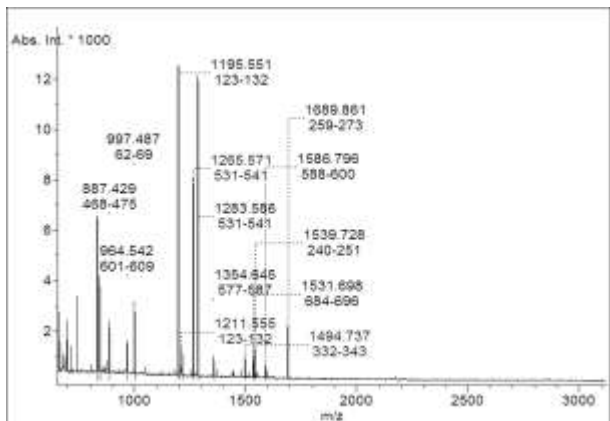

**D Spot 1184**  
 Zinc-alpha-2-glycoprotein

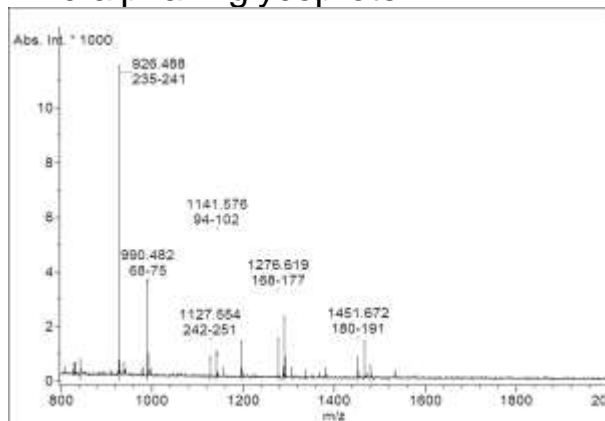

**E Spot 383**  
 Serotransferrin

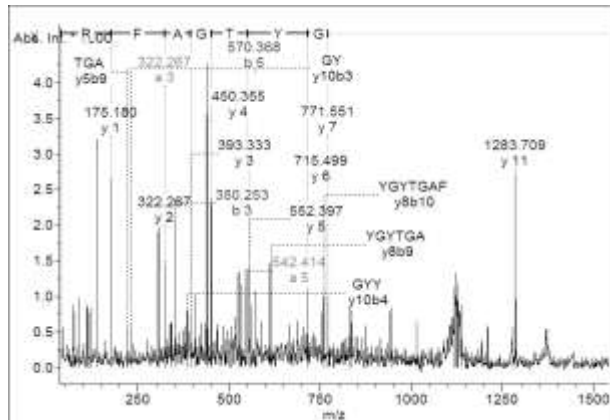

**F Spot 1158**  
 Alpha-1-acid glycoprotein

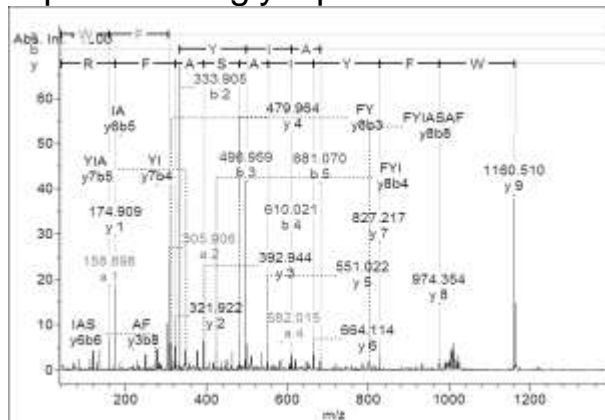

Supplement: c2mb25276g.pdf [file c2mb25276g.pdf]
